# Supplementary material
Source: PubMed Central journal article supplement (PMC4587452)
Supplement: supp_pp.15.00613_00613suppdata.pdf [file supp_pp.15.00613_00613suppdata.pdf]

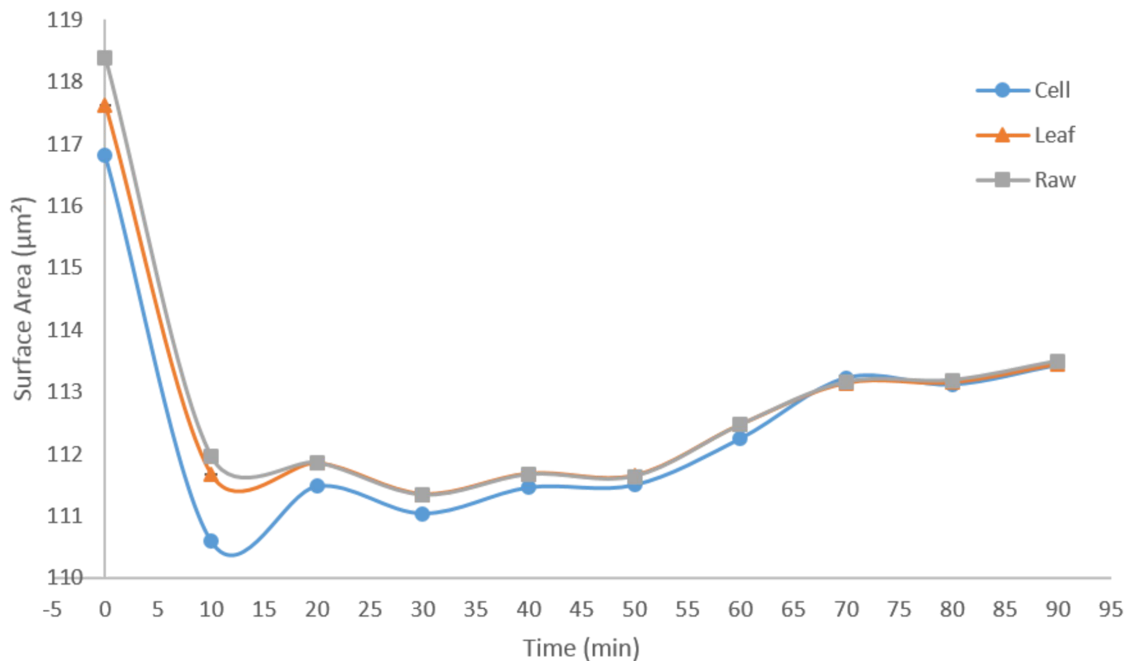

Supp. Figure 1. Change in Surface Area of a Wilting Leaf over Time. The surface area drops and from 118 to 112 within the first 10 minutes of abscission. After 50 min, the surface area increases, most likely due to the cells developing dales (valleys) that increase area in the z-dimension.

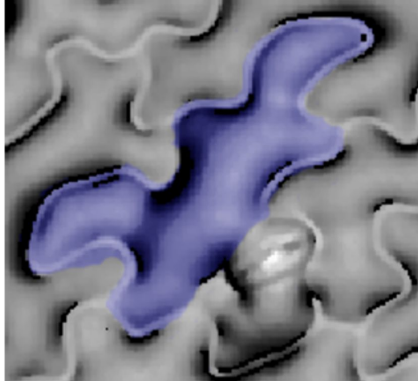

A

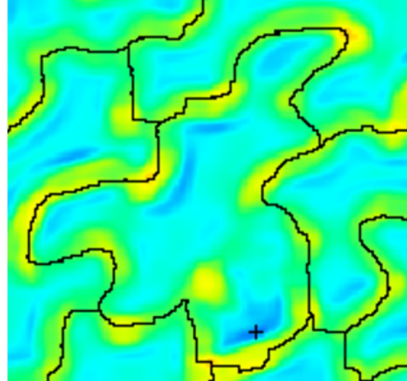

B

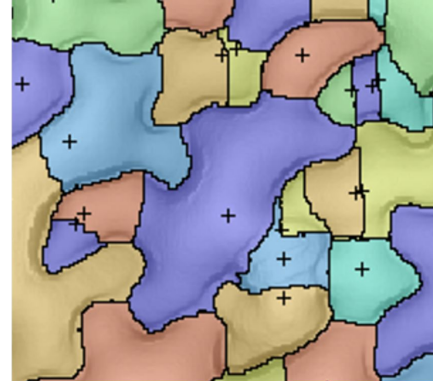

C

40  $\mu\text{m}$

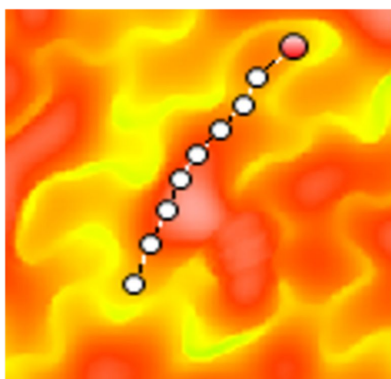

D

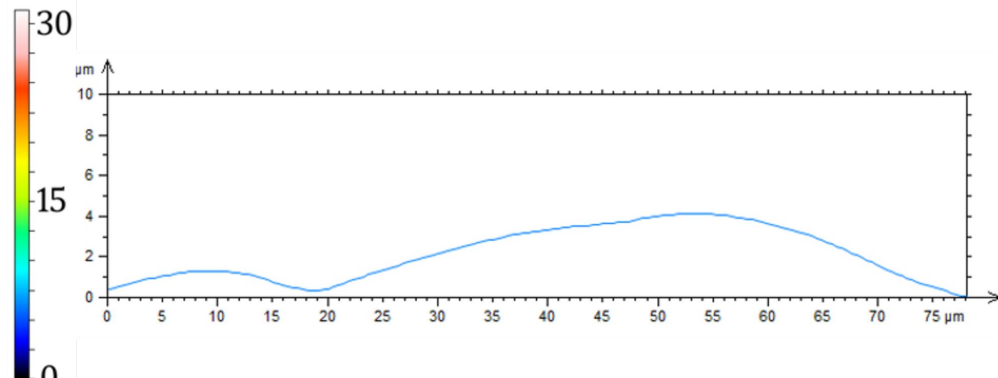

E

Supp. Figure 2. Motif Operator Identifies both Cells and Lobes in *rop2* mutants. A) Reflective intensity of *rop2* epidermis with false color of a single cell. B) Motif operator identification of the cell using relaxed parameters. C) Motif operator identification of lobes within the cell using conservative parameters. D) Transect measuring height across the cell. Color bar indicates height in  $\mu\text{m}$ . E) Graph of difference in height along transect.

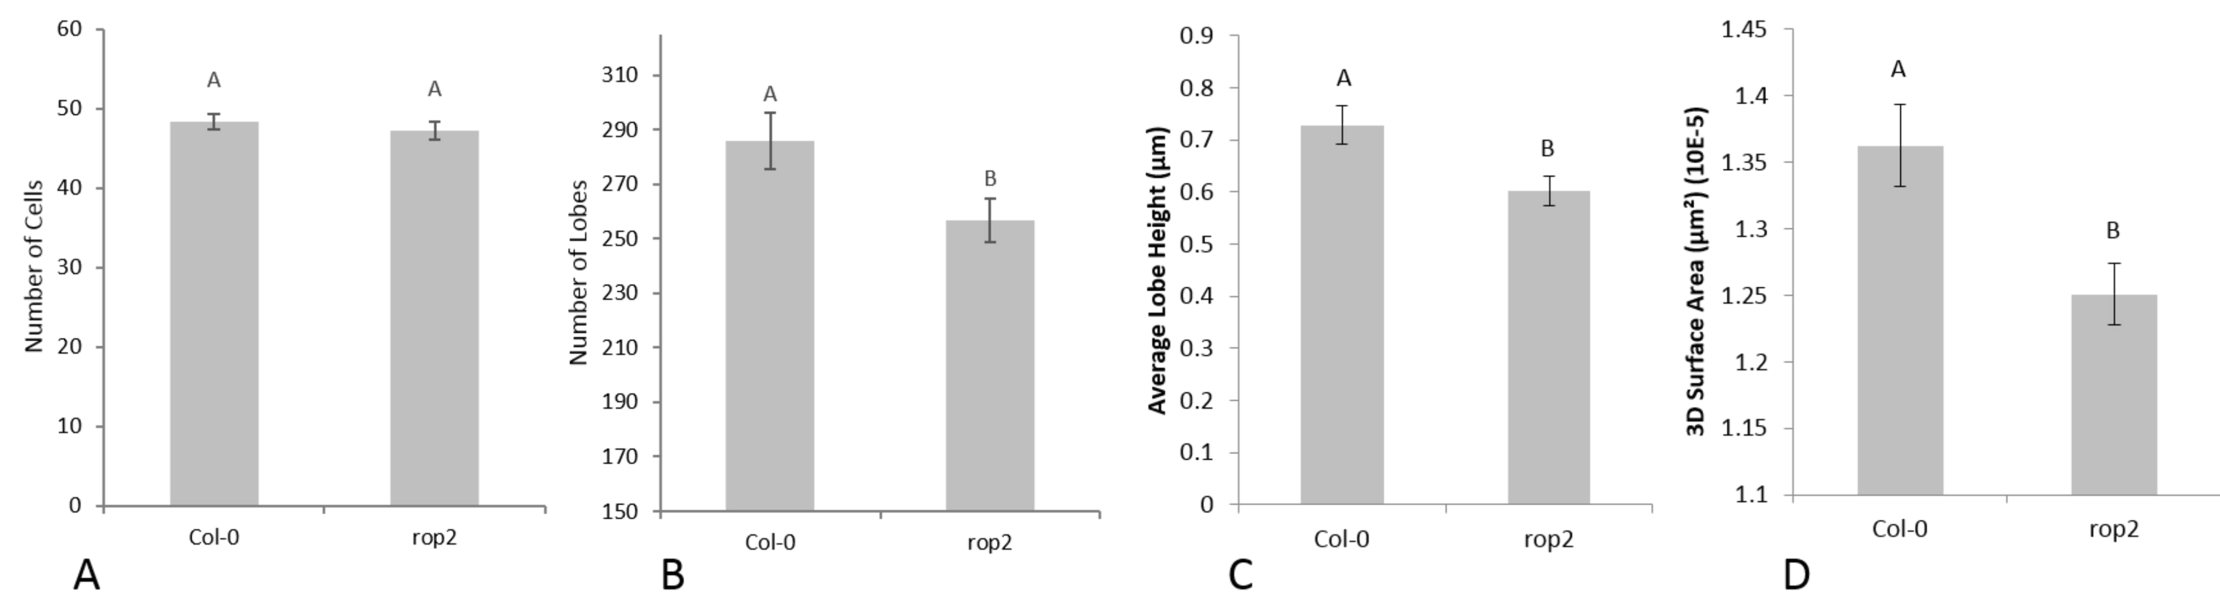

Supp. Figure 3. Confirmation of Cell Morphology *rop2* Mutant Phenotypes using OT. All analyses used a t-test with  $\alpha = 0.05$ ;  $n = 12$ , error bars, s.e.m. A) The number of pavement cells do not change significantly. There was significant difference for B) lobe number, C) average lobe height, and D) the 3D surface area of the total measurement.

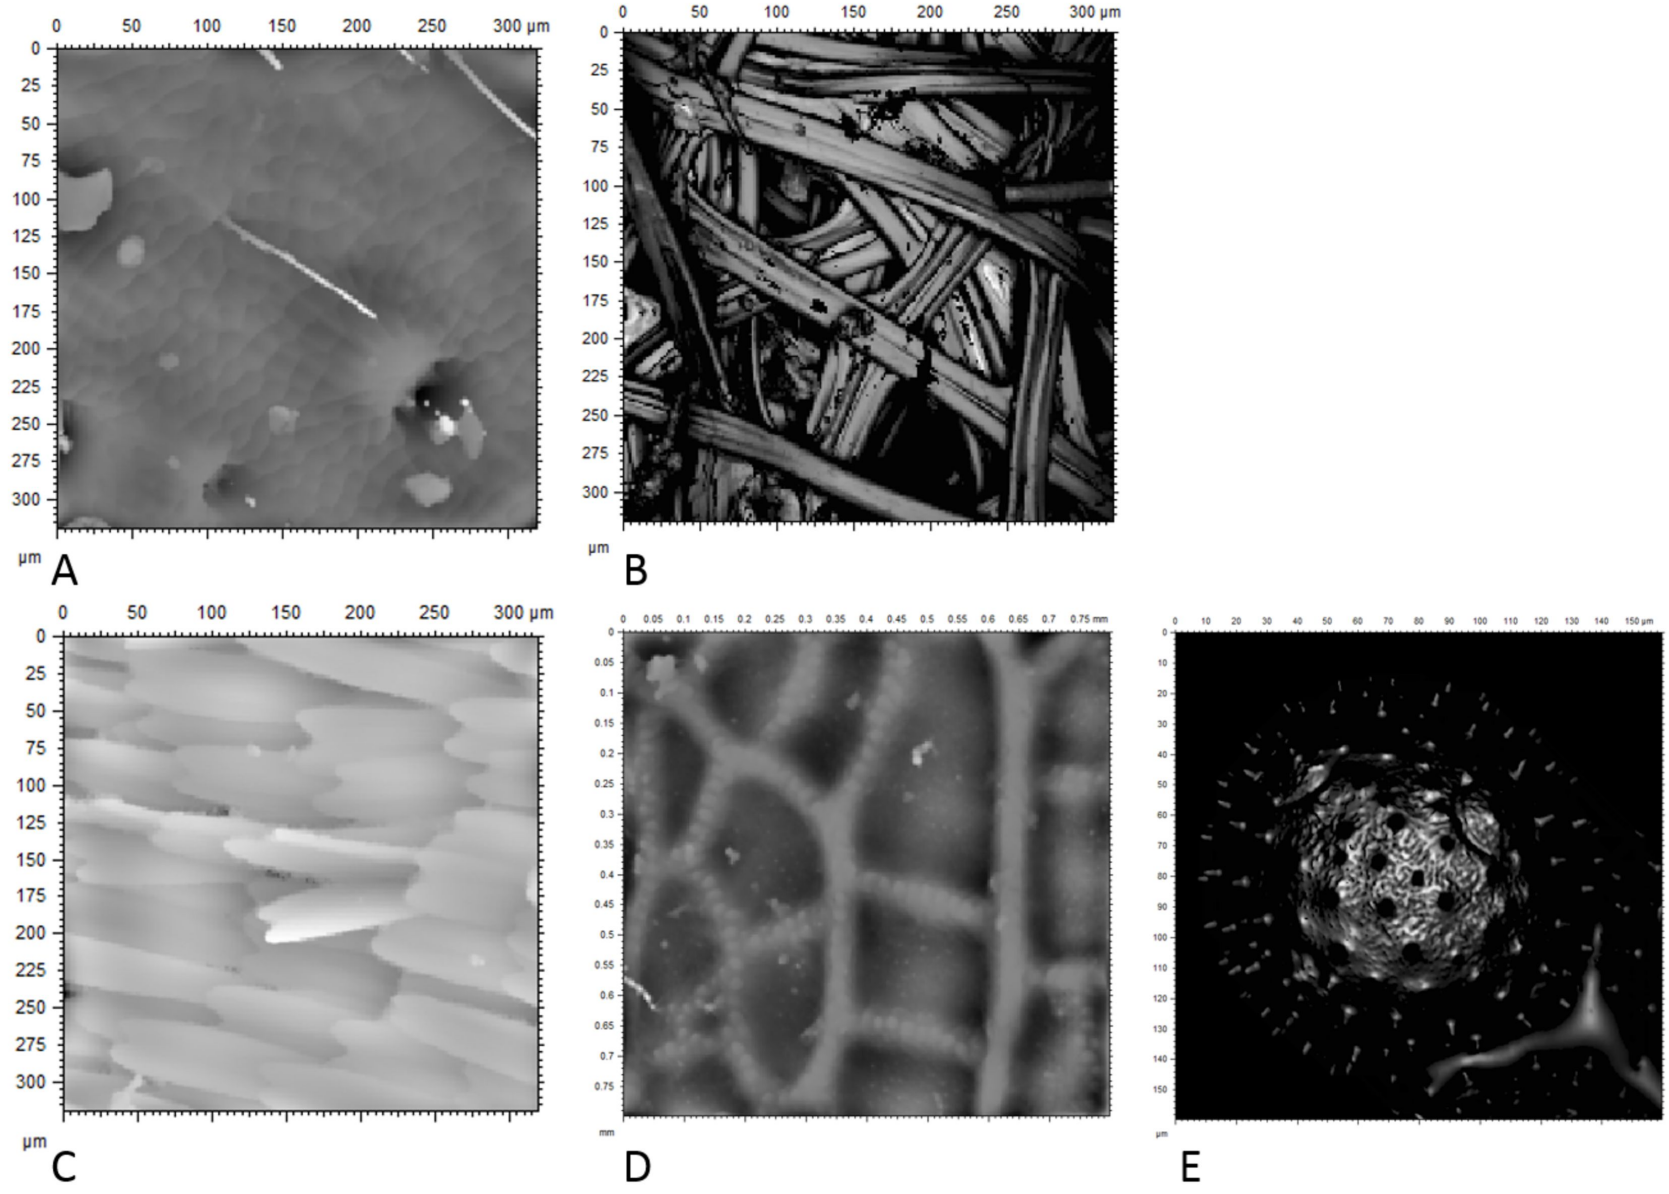

Supp. Figure 4. Topography of A) bee pollen collectors on *Bambus griseocolis* hind leg at 50x, B) Silk of cultivated silk worm (*Lepidoptera*) at 50x, C) *Lepidoptera* wing at 50x, D) *Caelifera* first wing at 20x, E) *Cucurbita* pollen at 100x.

Table S1. Isotropy and most significant directions of samples from Figure 4.

| <b>Time<br/>(min)</b> | <b>Isotropy<br/>(%)</b> | <b>First Direction<br/>(°)</b> | <b>Second Direction<br/>(°)</b> | <b>Third Direction<br/>(°)</b> |
|-----------------------|-------------------------|--------------------------------|---------------------------------|--------------------------------|
| <b>0</b>              | 85.5                    | 0.142                          | 116                             | 26.5                           |
| <b>10</b>             | 77.4                    | 116                            | 90                              | 135                            |
| <b>20</b>             | 61.7                    | 26.5                           | 45                              | 0.172                          |
| <b>30</b>             | 48.9                    | 26.5                           | 45                              | 18.5                           |

Table S2. Depth and area for each species with Tukey's assigned values ( $\alpha = 0.05$ ).

| SPECIES                          | DEPTH ( $\mu\text{m}$ ) | TUKEY <sub>DEPTH</sub> | AREA ( $\mu\text{m}^2$ ) | TUKEY <sub>AREA</sub> |
|----------------------------------|-------------------------|------------------------|--------------------------|-----------------------|
| <i>Adansonia digitata</i>        | 4.2                     | B                      | 1023.1                   | DEFG                  |
| <i>Asplenium nidus</i>           | 3.9                     | B                      | 1425.8                   | BCD                   |
| <i>Camptotheca acuminata</i>     | 2.0                     | BCD                    | 585.7                    | GH                    |
| <i>Carica papaya (SunUp)</i>     | -5.4                    | FG                     | 390.6                    | H                     |
| <i>Cyanotis somaliensis</i>      | 3.0                     | B                      | 1578.3                   | ABC                   |
| <i>Fouquieria fasciculata</i>    | -1.6                    | DEF                    | 800.6                    | EFGH                  |
| <i>Hedychium gardnerium</i>      | 2.7                     | B                      | 1243.3                   | CDE                   |
| <i>Homalocadium platycladium</i> | -1.2                    | CDE                    | 460.3                    | H                     |
| <i>Hoya curtisii</i>             | 8.3                     | A                      | 597.5                    | GH                    |
| <i>Mangifera indica</i>          | 2.6                     | BC                     | 479.4                    | H                     |
| <i>Manihot esculenta</i>         | -8.9                    | G                      | 706.1                    | FGH                   |
| <i>Mimosa pudica</i>             | -5.4                    | FG                     | 1141.7                   | CDEF                  |
| <i>Opuntia letocaulis</i>        | -4.8                    | DEF                    | 1728.7                   | AB                    |
| <i>Oreeopanax sanderianus</i>    | -54.1                   | J                      | 1034.4                   | DEFG                  |
| <i>Schlumbergera bridgesii</i>   | 5.8                     | AB                     | 2007.7                   | A                     |
| <i>Stangeria eriopus</i>         | 14.1                    | H                      | 1730.8                   | AB                    |
| <i>Uncarina grandidieri</i>      | 8.4                     | A                      | 481.7                    | H                     |
| <i>Vasconcella pubescens</i>     | 3.6                     | B                      | 1552.4                   | ABC                   |
| <i>Welwitschia mirabilis</i>     | -23.2                   | I                      | 1880.4                   | AB                    |

Table S3. Physiological features for characterizing *Mariosousa* and *Senegalia* herbarium specimen.

| <b>Species</b>               | <b>Spines</b> | <b>Trichomes</b>                  | <b>Cell Morphology</b>                         | <b>Stomata</b>         |
|------------------------------|---------------|-----------------------------------|------------------------------------------------|------------------------|
| <i>Mariososa centralis</i>   | No            | None                              | Single lobed                                   | Abaxial                |
| <i>Mariososa mannifera</i>   | No            | Both                              | Small, circular                                | Abaxial                |
| <i>Mariososa willardiana</i> | No            | Very few on adaxial               | Single lobed on adaxial<br>Circular on abaxial | Amphistomatous, sunken |
| <i>Senegalia berlandiara</i> | Yes           | Few on adaxial<br>Many on abaxial | Single lobed                                   | Abaxial                |
| <i>Senegalia visco</i>       | Yes           | Abaxial                           | Small, circular                                | Amphistomatous         |
